# Supplementary material
Source: MDPI journal article supplement (https://www.mdpi.com/2313-0105/9/6/305)
Supplement: s1 [file s1]

## Supplementary Data

**Table S1.** Characteristic particle diameter  $d_p$  of graphite material.

|            | $d_{10}$<br>[ $\mu\text{m}$ ] | $d_{50}$<br>[ $\mu\text{m}$ ] | $d_{90}$<br>[ $\mu\text{m}$ ] | $(d_{90} - d_{10})/d_{50}$<br>[-] |
|------------|-------------------------------|-------------------------------|-------------------------------|-----------------------------------|
| Gr_flake   | 10.25                         | 19.55                         | 36.74                         | 1.36                              |
| Gr15       | 11.90                         | 14.85                         | 18.03                         | 0.41                              |
| Gr20       | 11.48                         | 14.45                         | 17.66                         | 0.43                              |
| Gr25       | 11.20                         | 14.34                         | 17.64                         | 0.45                              |
| Gr30       | 10.79                         | 13.75                         | 16.82                         | 0.44                              |
| Gr_pancake | 10.73                         | 15.44                         | 21.42                         | 0.69                              |
| Gr15cc     | 12.39                         | 17.06                         | 22.55                         | 0.60                              |

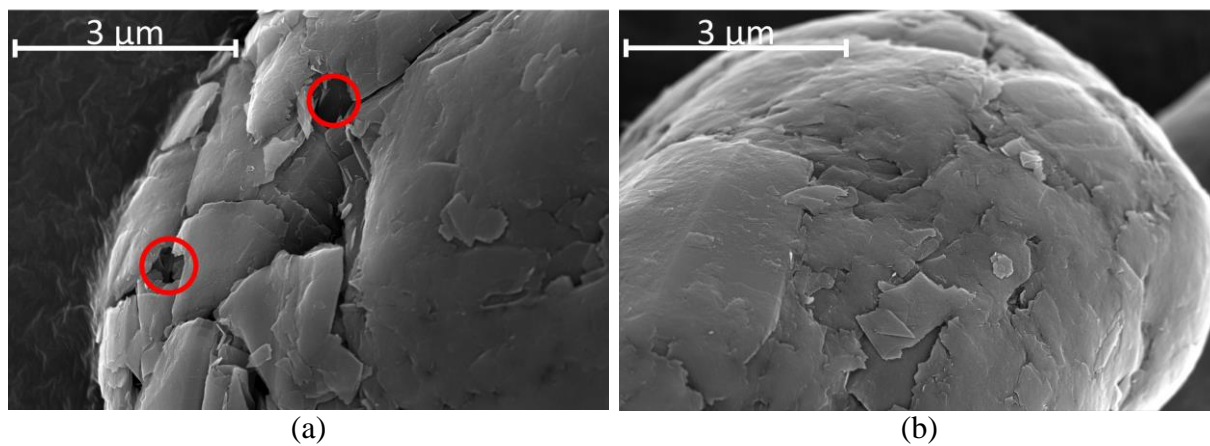

**Figure S1.** SEM image of surface of (a) Gr15 and (b) Gr30.

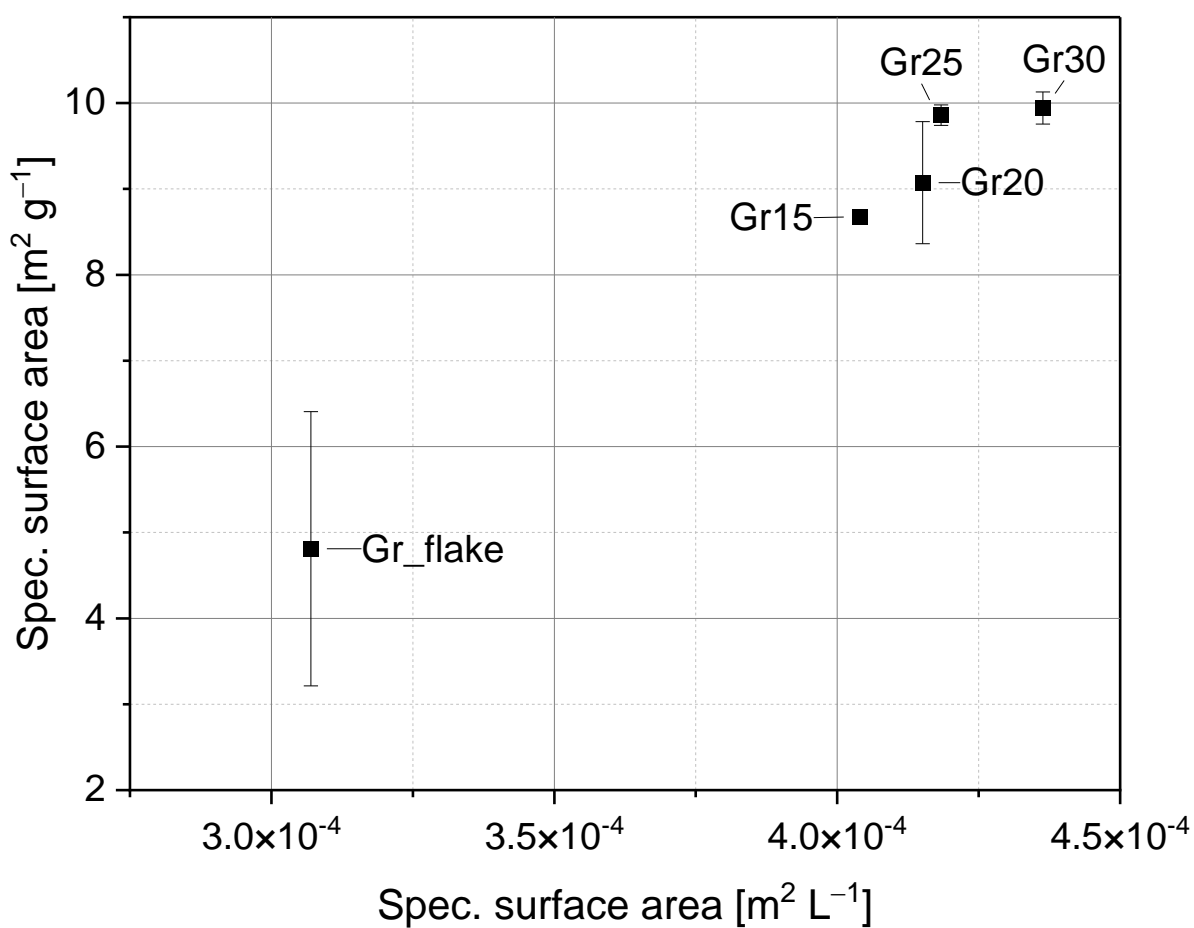

**Figure S2.** Link between volumetric specific surface area and mass specific surface area.

**Table S1.** Calendering of anodes with minimal roller gap (25  $\mu\text{m}$ ).

|            | Initial coating density<br>[g cm <sup>-3</sup> ] | Line load<br>[N mm <sup>-1</sup> ] | Coating density<br>[g cm <sup>-3</sup> ] |
|------------|--------------------------------------------------|------------------------------------|------------------------------------------|
| Gr_flake   | 0.89                                             | 338.0                              | 2.02                                     |
| Gr15       | 1.19                                             | 323.9                              | 1.92                                     |
| Gr20       | 1.19                                             | 341.3                              | 1.94                                     |
| Gr25       | 1.16                                             | 352.0                              | 1.86                                     |
| Gr30       | 1.16                                             | 343.3                              | 1.93                                     |
| Gr_pancake | 1.10                                             | 293.2                              | 1.90                                     |
| Gr15cc     | 1.11                                             | 308.3                              | 1.67                                     |

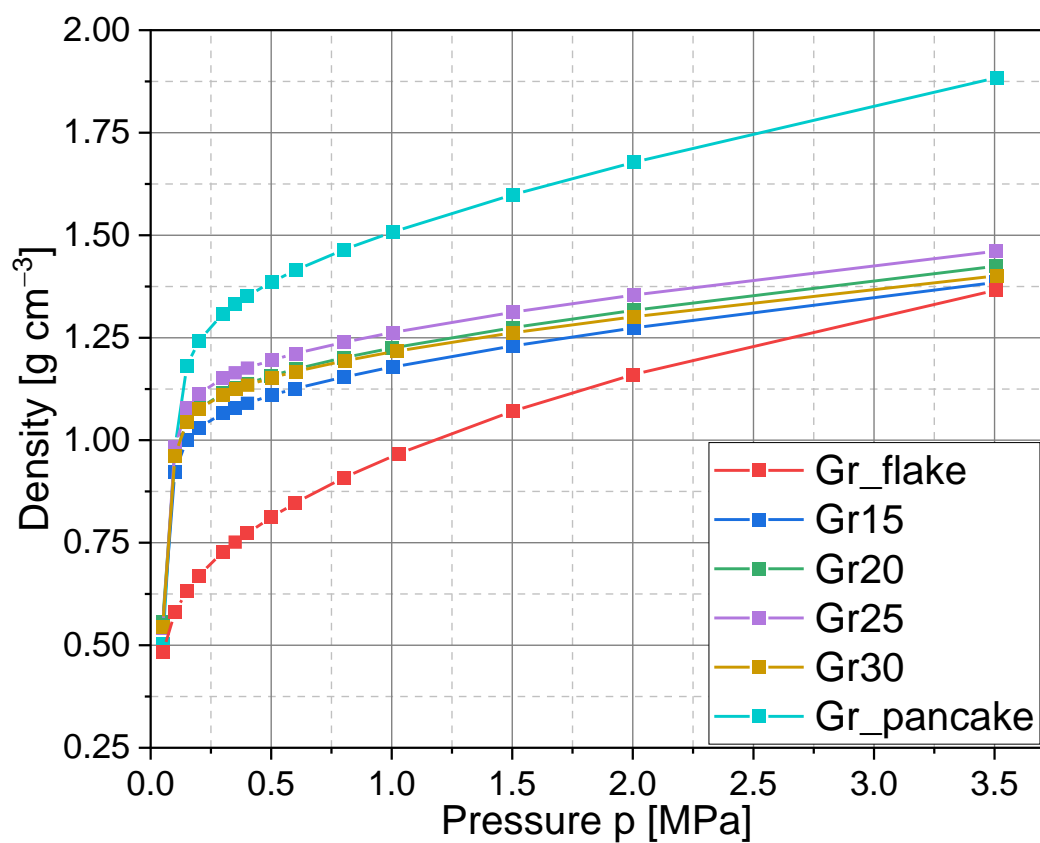

Figure S3. Density of graphite powder vs. pressure during compression.

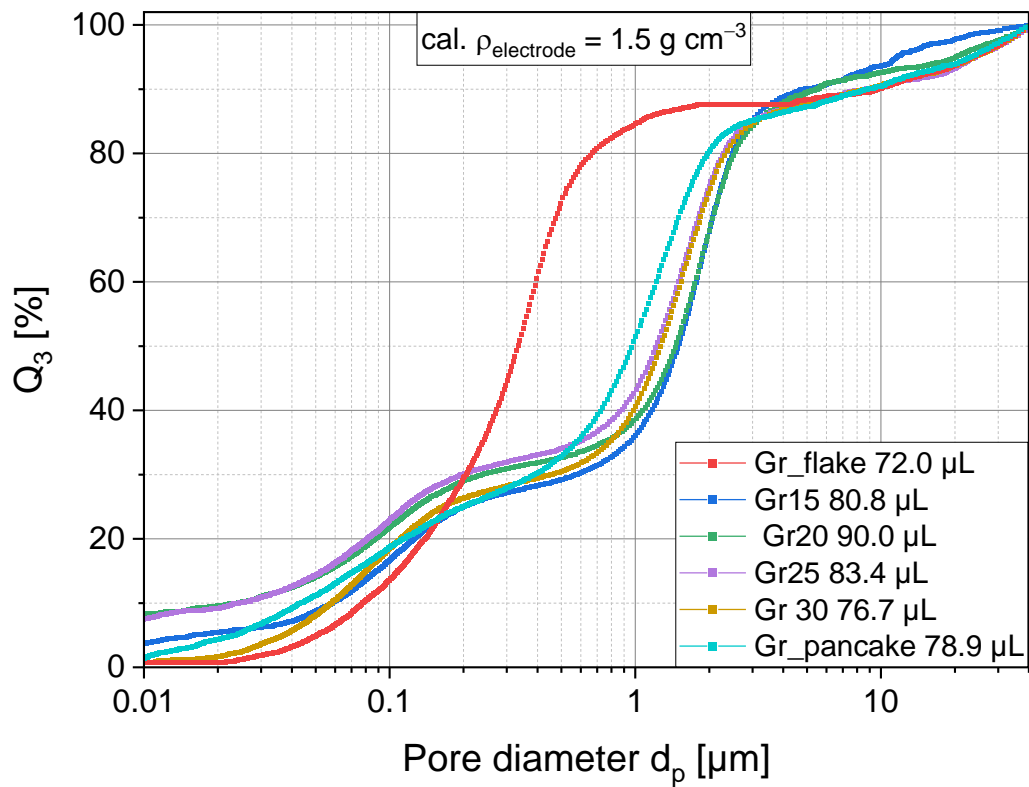

Figure S4. Total distribution of electrode porosity of different particle morphologies.

**Table S2.** Calendering of anodes to a density of 1.5 g cm<sup>-3</sup>.

|            | Initial coating density<br>[g cm <sup>-3</sup> ] | Line load<br>[N mm <sup>-1</sup> ] | Coating density<br>[g cm <sup>-3</sup> ] |
|------------|--------------------------------------------------|------------------------------------|------------------------------------------|
| Gr_flake   | 0.89                                             | 63.1                               | 1.51                                     |
| Gr15       | 1.19                                             | 62.0                               | 1.52                                     |
| Gr20       | 1.19                                             | 61.8                               | 1.51                                     |
| Gr25       | 1.16                                             | 66.6                               | 1.50                                     |
| Gr30       | 1.16                                             | 79.1                               | 1.52                                     |
| Gr_pancake | 1.10                                             | 84.2                               | 1.52                                     |
| Gr15cc     | 1.11                                             | 160.0                              | 1.48                                     |

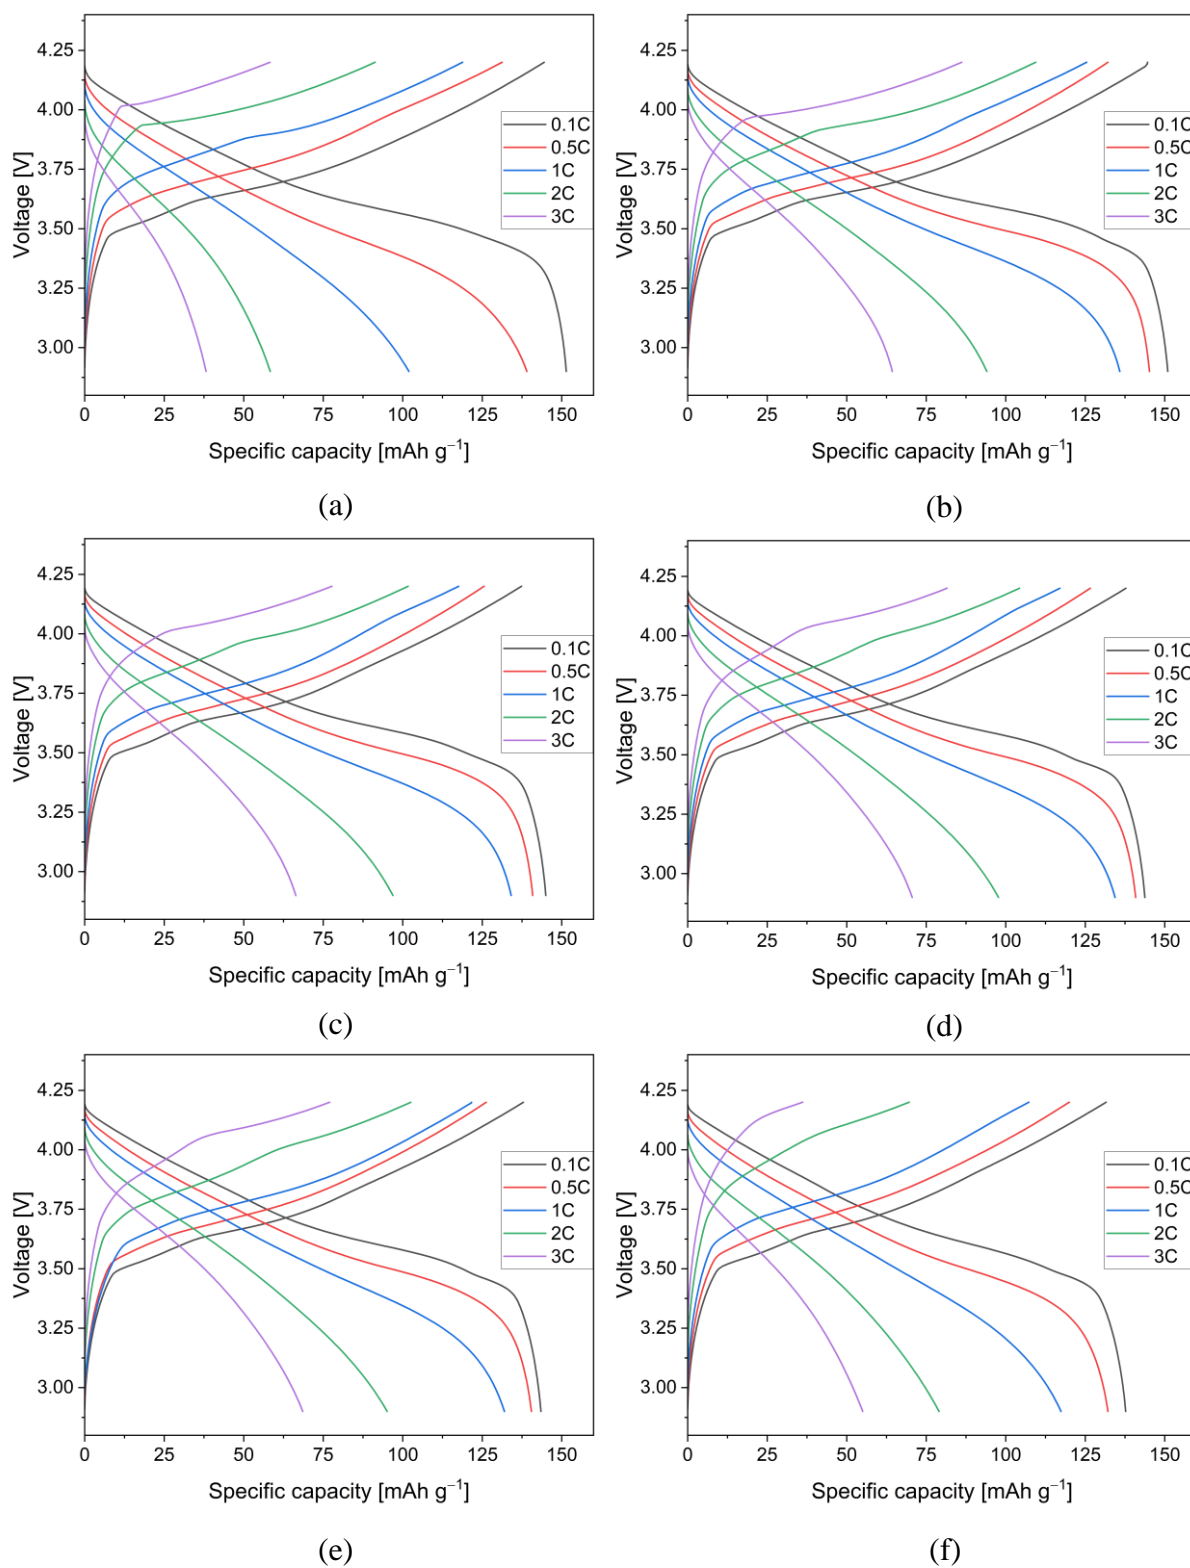

Figure S5 Galvanostatic charge/discharge voltage profiles of (a) Gr\_flake; (b) Gr15; (c) Gr20; (d) Gr25; (e) Gr30; and (f) Gr\_pancake composite electrodes.

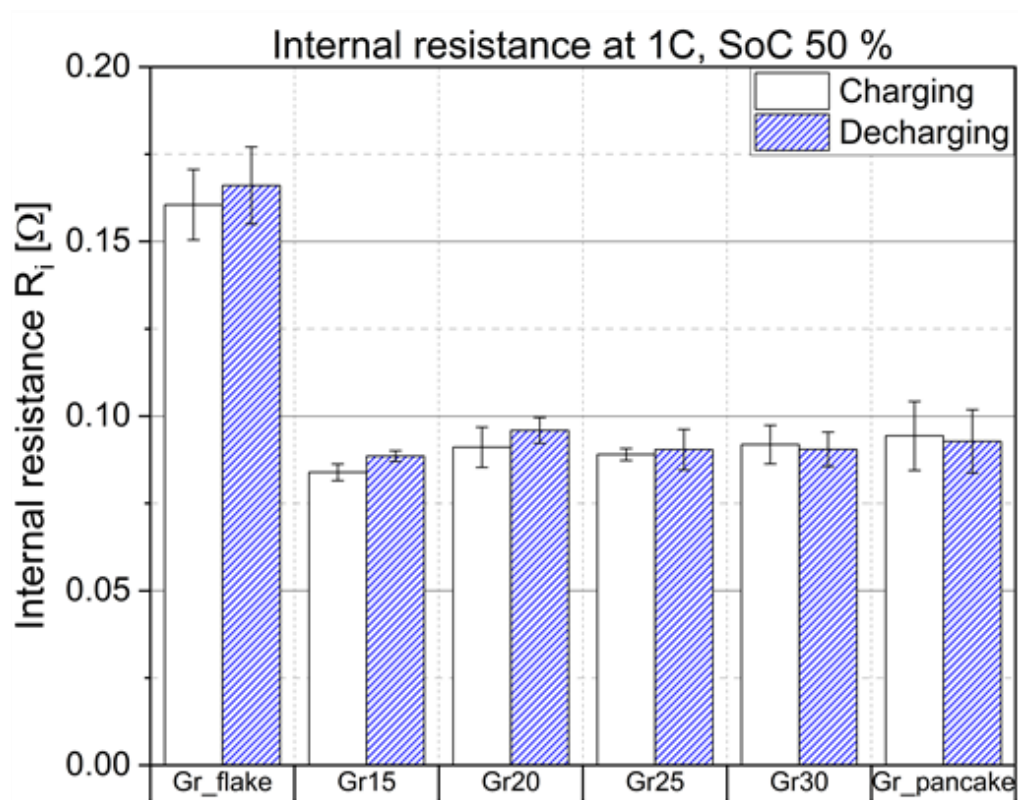

Figure S6 Internal electrical resistance during a cycle at 1C.

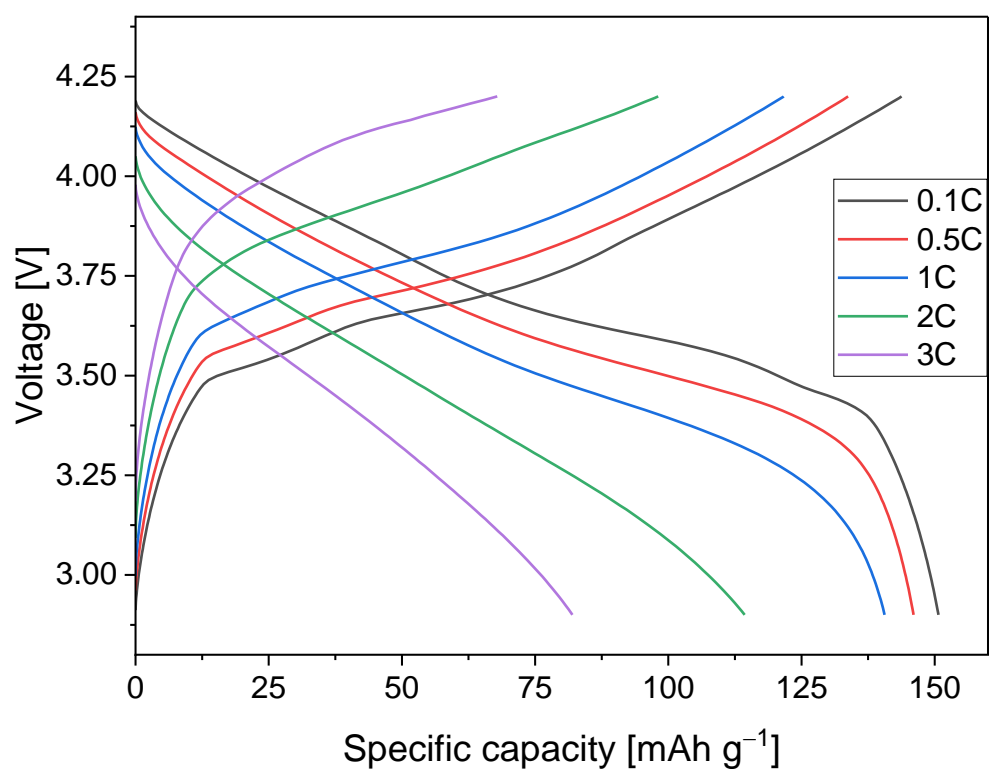

Figure S7 Galvanostatic charge/discharge voltage profiles pitch-coated spherical graphite (Gr15cc) composite electrodes.

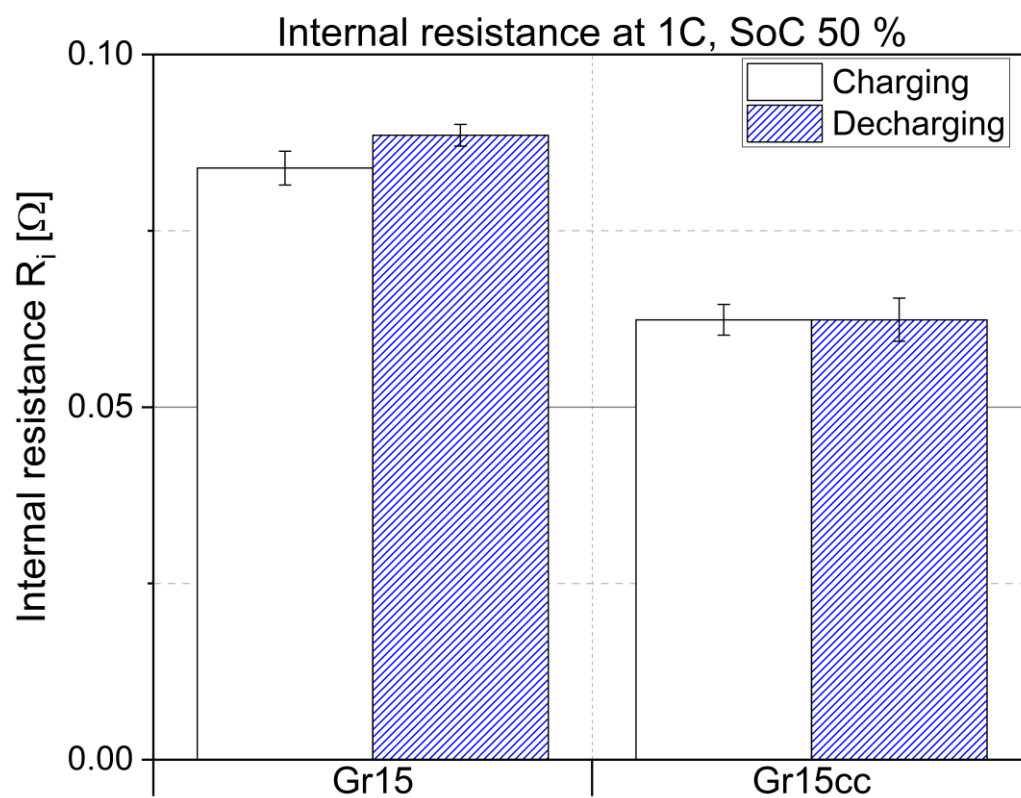

Figure S8 Internal electrical resistance during a cycle of Gr15 and Gr15cc at 1C.
